# Supplementary material for: Conditions for instability in the climate–carbon cycle system
Source: Copernicus journal article supplement (doi:10.5194/esd-16-2087-2025), 2025-11-20
Supplement: Supplementary file 1 [file esd-16-2087-2025-supplement.pdf]

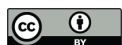

*Supplement of*

## **Conditions for instability in the climate–carbon cycle system**

**Joseph Clarke et al.**

*Correspondence to:* Joseph Clarke ([j.j.clarke@exeter.ac.uk](mailto:j.j.clarke@exeter.ac.uk))

The copyright of individual parts of the supplement might differ from the article licence.

## Sect. S1 Critical Lambda

Setting equation (12) to zero gives

$$\lambda = \frac{A}{B} \quad (\text{Eq. S1})$$

with

$$\begin{aligned} A = & -c_2\nu_1\nu_2 \left( \kappa \log(2)C_A^* \left( \frac{d\Pi}{dC_A} \mathcal{E}' \frac{V_1}{V_2} C_L^* + \Pi_0 \left( \mathcal{E}' \frac{V_1}{V_2} + \frac{V_1}{V_2} + 1 \right) \right) - \alpha\beta\mathcal{E}'\Pi_0 Q_{2\times} \frac{V_1}{V_2} C_L^* \right) \\ & - c_1\kappa\nu_1\nu_2 \log(2)C_A^* \left( \frac{d\Pi}{dC_A} \mathcal{E}' \frac{V_1}{V_2} C_L^* + \Pi_0 \left( \mathcal{E}' \frac{V_1}{V_2} + \frac{V_1}{V_2} + 1 \right) \right) \\ & + \alpha\beta\kappa\Pi_0 Q_{2\times} C_L^* \left( \mathcal{E}'\nu_1 + \nu_2 \left( \frac{V_1}{V_2} + 1 \right) \right) \quad (\text{Eq. S2}) \end{aligned}$$

and

$$\begin{aligned} \frac{B}{\log(2)C_A^*C_L^*} = & \nu_1 \left( \nu_2 \left( c_2 \frac{d\Pi}{dC_A} \mathcal{E}' \frac{V_1}{V_2} + \mathcal{E}'\kappa \frac{V_1}{V_2} + \kappa + \kappa \frac{V_1}{V_2} \right) + \frac{d\Pi}{dC_A} \mathcal{E}'\kappa \right) \\ & + \frac{d\Pi}{dC_A} \kappa\nu_2 \left( \frac{V_1}{V_2} + 1 \right) \\ & + \Pi_0 \left( \nu_1 \left( c_2\nu_2 \left( \mathcal{E}' \frac{V_1}{V_2} + \frac{V_1}{V_2} + 1 \right) + (\mathcal{E}' + 1)\kappa \right) + \kappa\nu_2 \left( \frac{V_1}{V_2} + 1 \right) \right) \quad (\text{Eq. S3}) \end{aligned}$$

where  $\mathcal{E}' = \mathcal{E}'(C_1^*)$  and the prime denotes a derivative with respect to  $C_1$ . We can simplify this further by making the ‘obvious’ assumption that  $\mathcal{E}'\nu_1 \gg \nu_2$ ,  $\nu_1 \gg \nu_2$ ,  $c_2 \gg c_1$  and  $1 \gg V_1/V_2$ . Neglecting these small terms and rearranging gives

$$\frac{\alpha\beta Q_{2\times}}{\lambda \log 2} = \frac{C_A^*}{\kappa\Pi_0 C_L^* \mathcal{E}'\nu_1} \frac{\kappa C_L^* \frac{d\Pi}{dC_A} \mathcal{E}'\nu_1 + \kappa C_L^* \nu_1\nu_2 + \Pi_0 (\kappa\nu_1 + \mathcal{E}'\kappa\nu_1 + c_2\nu_1\nu_2)}{1 - \frac{C_A^* \nu_2 c_2}{C_L^* \mathcal{E}' \alpha\beta Q_{2\times}}}. \quad (\text{Eq. S4})$$

Applying the binomial theorem to the denominator and working to first order gives

$$\frac{\alpha\beta Q_{2\times}}{\lambda \log 2} = \left( \frac{d \log \Pi}{d \log C_A} + \frac{C_A^*}{C_L^*} \left( 1 + \frac{1}{\mathcal{E}'} + \frac{c_2\nu_2}{\kappa\mathcal{E}'} + \frac{C_L^* \nu_2}{\Pi_0 \mathcal{E}'} \right) \right) \left( 1 + \frac{C_A^* \nu_2 c_2}{C_L^* \mathcal{E}' \alpha\beta Q_{2\times}} \right) \quad (\text{Eq. S5})$$

as desired.

## Sect. S2 Fitting *Alk*

The parameter *Alk* was estimated by fitting the ocean model (equation (1d) and equation (1e)) to the ocean carbon uptake from the Global Carbon Budget (GCB) [Fri+22].

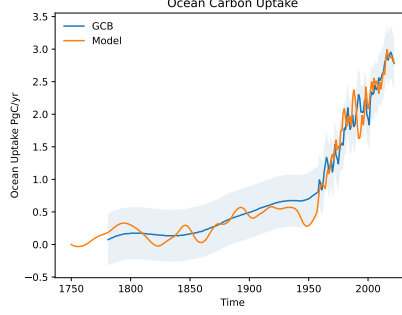

Figure S1: The ocean carbon uptake as estimated by equation (Eq. S6), where  $Alk$  has been chosen to minimise the squared error between the estimated uptake and the GCB ocean uptake estimate.

The system

$$\frac{dC_1}{dt} = \nu_1(C_A(t) - \mathcal{E}(C_1)) - \nu_2 \left( C_1 - \frac{V_1}{V_2} C_2 \right) \quad (\text{Eq. S6a})$$

$$\frac{dC_2}{dt} = \nu_2 \left( C_1 - \frac{V_1}{V_2} C_2 \right) \quad (\text{Eq. S6b})$$

was integrated with  $C_A(t)$  defined as the mass of  $\text{CO}_2$  in the atmosphere in year  $t$  as estimated by GCB. The ocean uptake, defined as the change in  $C_1 + C_2$  in each year could then be compared to the annual ocean uptake as estimated by GCB. The parameter  $Alk$  was chosen to minimise the squared error between these quantities. The best fit parameter of  $Alk$  was 5130 Pg C.

The fitted ocean carbon uptake is shown in Fig. S1.

## Sect. S3 JULES-IMOGEN

Figure S2 shows the response of NPP in JULES to increased  $\text{CO}_2$ . Atmospheric  $\text{CO}_2$  was increased linearly at a rate of  $5 \text{ ppm yr}^{-1}$  with IMOGEN's climate sensitivity set to 3.3K. It was found that equation (3) could reproduce the results of this experiment with  $\Pi_0$  set to  $65 \text{ Pg C yr}^{-1}$  and  $C_{1/2}$  set to 344 ppm.

Figure S3 shows the total soil carbon in JULES after spin up. Over the course of the simulation, the soil carbon changes by 0.008% and has an average of 1630 Pg C.

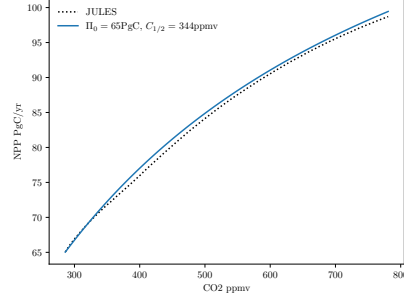

Figure S2: The response of NPP to increased  $\text{CO}_2$  in JULES, with a climate sensitivity of  $3.3\text{K}$ .  $\text{CO}_2$  was increased linearly by  $5\text{ ppm yr}^{-1}$ . Equation (3) was linearly regressed to this to give an estimate for  $C_{1/2}$ . The value of  $\Pi_0$  was also extracted.

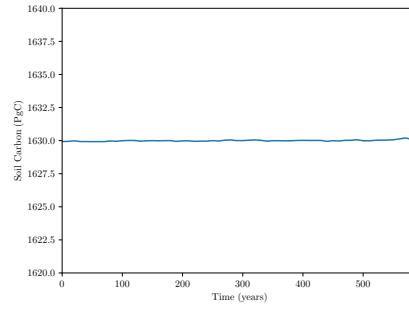

Figure S3: Equilibrium soil carbon. The change is  $0.008\%$  over the course of the simulation.

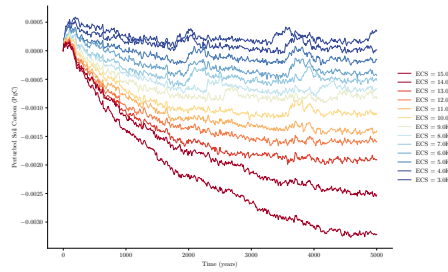

Figure S4: Change in global soil carbon in JULES/IMOGEN for a range of ECS values. The decrease indicates the rise in  $\text{CO}_2$  is caused by a loss of soil carbon.

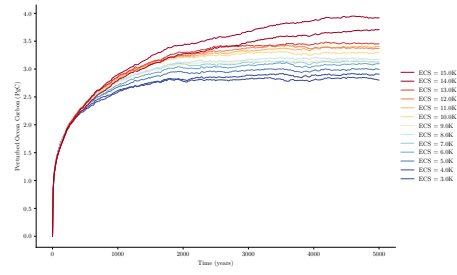

Figure S5: Change in ocean carbon JULES/IMOGEN for a range of ECS values. The rise is caused by absorbing the initial  $\text{CO}_2$  perturbation.

## References

- [Fri+22] Pierre Friedlingstein et al. “Global Carbon Budget 2022”. In: *Earth System Science Data* 14.11 (Nov. 2022), pp. 4811–4900. issn: 1866-3516. DOI: 10.5194/essd-14-4811-2022. URL: <https://essd.copernicus.org/articles/14/4811/2022/>.
